# Supplementary material
Source: PubMed Central journal article supplement (PMC3890859)
Supplement: 1315368111_pnas.201315368SI.pdf [file 1315368111_pnas.201315368SI.pdf]

# Supporting Information

Swaminathan et al. 10.1073/pnas.1315368111

## SI Materials and Methods

### Cloning, Expression, and Purification of GST and GFP Fusion Proteins.

A vector coding for full-length coronin with GFP at the C terminus under the control of actin15 promoter was described previously (1). This plasmid was referred to as GFP-cor WT. The GFP-coronin MUT1 and MUT2 constructs were created by site-directed mutagenesis using appropriate primers and the Quik-Change Site-Directed Mutagenesis Kit (Stratagene) and the sequence verified. Cloning of GFP-p21-activated kinase a (PAKa) and generation of a dominant-negative PAKa (GFP-PAKa-c) was described earlier (2). The plasmids were transformed into AX2 and *corA* knockout cells by electroporation. Transformants expressing the respective GFP-tagged proteins were selected by using G418 (Geneticin, Life Technologies). The expression levels were determined by Western blots. For the expression of different coronin deletion proteins as GST fusion proteins, appropriate coding sequences were PCR amplified and cloned into the expression vector pGEX 4T-2 (GE Healthcare) using BamHI and XmaI sites. GST fusion proteins were expressed in *Escherichia coli* strain XL1 blue and purified from the soluble fraction using Glutathione Sepharose affinity columns (GE Healthcare). A 200 bp fragment encoding the Cdc42- and Rac-interactive binding (CRIB) domain of coronin was cloned into the expression vector pBsrN2 (3) and introduced into AX2 cells. The transformants were selected with blasticidine 1.5  $\mu\text{g}/\text{mL}$  (MP Biomedicals). Rac proteins were expressed as GST- and GFP-tagged fusion proteins.

GFP-myosin heavy chain kinases (MHCKs) expression plasmids were procured from the DictyStock center ([www.dictybase.org](http://www.dictybase.org)) and expressed in wild-type and coronin mutant cells. The expression levels were analyzed by Western blotting with anti-GFP mAb K3-184-2.

**Loading of Rac GTPases with GDP or GTP $\gamma$ S.** For direct interaction assays, GST, GST-Rac1a, and RacC bound to Glutathione Sepharose columns were loaded with GDP or GTP $\gamma$ S in nucleotide exchange buffer (25 mM Hepes, pH 7.4, 100 mM NaCl, 10 mM EDTA, and 1 mM DTT) for 1 h at 4  $^{\circ}\text{C}$ . Equivalent amounts of thrombin cleaved fragment (NT CRIB) were added to the preloaded columns and incubated for 1 h at 4  $^{\circ}\text{C}$ . After repeated washing, the bound proteins were separated by SDS/PAGE [15% (vol/vol) polyacrylamide] and visualized with Coomassie Blue. For interaction of full-length coronin with Rac GTPases, AX2 cells ( $5 \times 10^7$ ) were lysed by sonication in lysis buffer [25 mM Tris-HCl, pH 7.5, 100 mM NaCl, 5 mM MgCl<sub>2</sub>, 2 mM EGTA, 2 mM DTT, and 1% Nonidet P-40 with EDTA-free protease inhibitor mixture (Roche)], and equivalent amounts of cell lysates were added to columns containing GST, GST-Rac1b, and GST-RacB preloaded with either GDP or GTP $\gamma$ S. After 2 h of incubation at 4  $^{\circ}\text{C}$ , beads were washed with wash buffer (lysis buffer without protease inhibitor), and pull-down eluates were analyzed in Western blots with anticoronin mAb 176-3-6 (4). Interaction of Dictyostelium GTPases activating protein 1 (DGAP1) with Rac1a was analyzed as described. Probing was with mAb 216-394-1 (5).

**Immunoprecipitation and Pull-Down Experiments.** For coronin self-association studies, equivalent amounts of AX2 cells ( $5 \times 10^7$ ) expressing GFP-cor WT and GFP-MUT were lysed by pipetting several times in 500  $\mu\text{L}$  lysis buffer (10 mM Tris-HCl, pH 7.5, 100 mM NaCl, 1 mM EDTA, and 0.5% Nonidet P-40 with protease inhibitor mixture) and incubated on ice for 20 min. We then added 500  $\mu\text{L}$  of dilution buffer (10 mM

Tris-HCl, pH 7.5, 100 mM NaCl, and 1 mM EDTA) to the clarified lysate and incubated it with 20  $\mu\text{L}$  of GFP-TRAP beads (ChromoTek) for 2 h at 4  $^{\circ}\text{C}$ . The beads were washed and the immunoprecipitates were analyzed by Western blots with anti-GFP mAb K3-184-2 (3) and anticoronin mAb 176-3-6 (4). Interaction of Rac1a GTPase with coronin fragments was investigated by pull-down assays. AX2 cells expressing GFP-Rac1a ( $5 \times 10^7$  cells) were lysed (25 mM Tris-HCl, pH 7.5, 150 mM NaCl, 5 mM EDTA, 0.5% Nonidet P-40, 1 mM DTT, and 5% glycerol) supplemented with protease inhibitors (Sigma) and incubated with equivalent amounts of GST and coronin GST fusion proteins bound to Glutathione Sepharose beads for 2 h at 4  $^{\circ}\text{C}$ . The pull-down eluates were immunoblotted with GFP-specific mAb K3-184-2. Interaction of full-length coronin with Rac1a GTPase was investigated by coimmunoprecipitation experiments as described above.

For determining the levels of activated Rac in *Dictyostelium discoideum* cells, a pull-down with the GTPase binding domain (GBD) from rat PAK1 kinase (GST-PAK-GBD), which specifically interacts with the GTP-bound form of Rac1, was carried out followed by Western blot analysis with polyclonal antibodies against Rac (6). The amount of activated Rac from AX2 wild-type and coronin mutant cells were calculated by ImageJ, and the data are represented in a bar chart.

**Kinase Assay.** Kinase assays were performed as described previously (7). Equivalent amounts of cells ( $2-3 \times 10^7$ ) were lysed (25 mM Tris-HCl, pH 7.5, 100 mM NaCl, 1 mM EDTA, 1 mM EGTA, 1% Nonidet P-40, and 1 mM DTT) supplemented with protease inhibitors (Sigma) and phosphatase inhibitors (PhosphoSTOP, Roche). The clarified lysate was incubated with 20  $\mu\text{L}$  of GFP-TRAP beads (ChromoTek) for 2 h at 4  $^{\circ}\text{C}$ . The beads were washed four times in lysis buffer without protease inhibitors and once in kinase buffer (25 mM Mops, pH 7.4, 20 mM MgCl<sub>2</sub>, and 30 mM KCl supplemented with phosphatase inhibitors). The purified GFP-MHCK proteins were further incubated with Histone 2B substrate and ATP mix (ATP and <sup>32</sup>P- $\gamma$ -ATP) for 10 min at room temperature, and the kinase activity was measured by autoradiography.

**Miscellaneous Methods.** Isolation and analysis of cytoskeletal fractions were done as described earlier (4). Briefly, equivalent amount of cells ( $2.5 \times 10^7$ ) were collected from Petri dishes in 300  $\mu\text{L}$  of Soerensen phosphate buffer (17 mM Na<sup>+</sup>/K<sup>+</sup> phosphate, pH 6.0) and lysed in 2 $\times$  cytoskeletal buffer (25 mM Tris-HCl, pH 7.5, 30 mM KCl, 5 mM EGTA, 1% Nonidet P-40) supplemented with protease inhibitors (Sigma). After a 10 min incubation on ice, the tubes were transferred to room temperature and incubated for another 10 min. Detergent insoluble fractions were collected by centrifugation at 10,000  $\times g$  for 4 min, and equivalent amounts of pellet and the supernatant fractions were loaded in a 10% polyacrylamide gel. The gels were stained with Coomassie Blue, and myosin II was quantified using ImageJ. To quantify nuclei number, growth phase cells were collected from Petri dishes and fixed with methanol. Nuclei were stained with DAPI, and nuclei in more than 500 cells of each strain were quantified. To analyze CRIB sequences of coronin, CRIB motifs of *Dictyostelium discoideum* coronin (P27133), *Homo sapiens* p-21 activated kinase (HsPAK1) (Q13153), *Homo sapiens* Wiskott-Aldrich syndrome protein (HsWASP) (P42758), *Dictyostelium discoideum* Wiskott-Aldrich syndrome protein (DdWASP) (Q7KWP7), and *Dictyostelium discoideum*

p21-activated protein kinase b (DdPAKb) (Q869N2) were retrieved and aligned using the clustalW2 online program (8).

The aligned sequence was processed using ESPript 2.2 (9) for representation.

- Gerisch G, Albrecht R, Heizer C, Hodgkinson S, Maniak M (1995) Chemoattractant-controlled accumulation of coronin at the leading edge of *Dictyostelium* cells monitored using a green fluorescent protein-coronin fusion protein. *Curr Biol* 5(11): 1280–1285.
- Müller-Taubenberger A, et al. (2002) Differential localization of the *Dictyostelium* kinase DPAKa during cytokinesis and cell migration. *J Muscle Res Cell Motil* 23(7-8):751–763.
- Blau-Wasser R, et al. (2009) CP250, a novel acidic coiled-coil protein of the *Dictyostelium* centrosome, affects growth, chemotaxis, and the nuclear envelope. *Mol Biol Cell* 20(20):4348–4361.
- de Hostos EL, et al. (1993) *Dictyostelium* mutants lacking the cytoskeletal protein coronin are defective in cytokinesis and cell motility. *J Cell Biol* 120(1):163–173.
- Faix J, et al. (1998) The IQGAP-related protein DGAP1 interacts with Rac and is involved in the modulation of the F-actin cytoskeleton and control of cell motility. *J Cell Sci* 111 (Pt 20):3059–3071.
- Filić V, Marinović M, Faix J, Weber I (2012) A dual role for Rac1 GTPases in the regulation of cell motility. *J Cell Sci* 125(Pt 2):387–398.
- Chung CY, Firtel RA (1999) PAKa, a putative PAK family member, is required for cytokinesis and the regulation of the cytoskeleton in *Dictyostelium discoideum* cells during chemotaxis. *J Cell Biol* 147(3):559–576.
- Larkin MA, et al. (2007) Clustal W and Clustal X version 2.0. *Bioinformatics* 23(21): 2947–2948.
- Gouet P, Courcelle E, Stuart DI, Métz F (1999) ESPript: Analysis of multiple sequence alignments in PostScript. *Bioinformatics* 15(4):305–308.

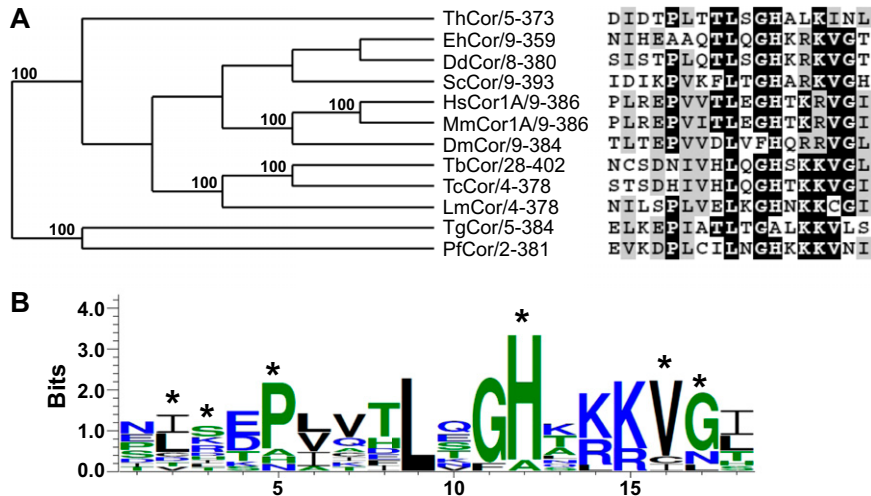

**Fig. S1.** Sequence and structural analysis of CRIB domain of short coronins. (A) Conservation of the CRIB domain in short coronins across taxa. Protein sequences of coronin from *Homo sapiens* (P31146), *Mus musculus* (O89053), *Drosophila melanogaster* (Q7JY0), *Saccharomyces cerevisiae* (Q06440), *Entamoeba histolytica* (C4M137), *D. discoideum* (P27133), *Tetrahymena thermophila* (I7MIA8), *Trypanosoma cruzi* (Q4D4 × 6), *Trypanosoma brucei brucei* (Q57W63), *Toxoplasma gondii* (Q5Y1E7), *Leishmania major* (Q4QB38), and *Plasmodium falciparum* (O44021) were retrieved, and the core tryptophan-aspartic acid (WD) repeats were aligned using the ClustalX program (1). A bootstrap Neighbor Joining (NJ) tree was created, and the resulting cladogram is shown with supporting bootstrap values in percent. The CRIB sequence alignment of respective coronins is shown on the right side of the tree. (B) Sequence logo of the coronin CRIB domains. CRIB sequences of coronin proteins were retrieved, and a sequence logo was created using the WebLogo online program (2). The overall height of the stack in bits indicates the sequence conservation at that position. The CRIB consensus amino acids are highlighted with asterisks.

- Larkin MA, et al. (2007) Clustal W and Clustal X version 2.0. *Bioinformatics* 23(21):2947–2948.
- Schneider TD, Stephens RM (1990) Sequence logos: A new way to display consensus sequences. *Nucleic Acids Res* 18(20):6097–6100.



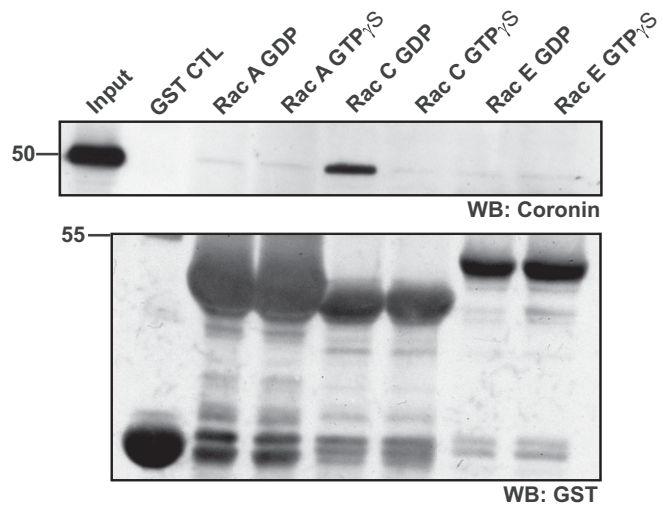

**Fig. S3.** Coronin-Rac interaction. GST, GST-RacA, GST-RacC, and GST-RacE bound to Glutathione Sepharose beads were loaded with GDP or GTP $\gamma$ S and incubated with cell lysates from AX2 cells. After repeated washing of beads, the bound proteins were immunoblotted with anticoronin antibody. The membrane was stripped and probed with DGAP1 using 216-394-1 antibody as a control.

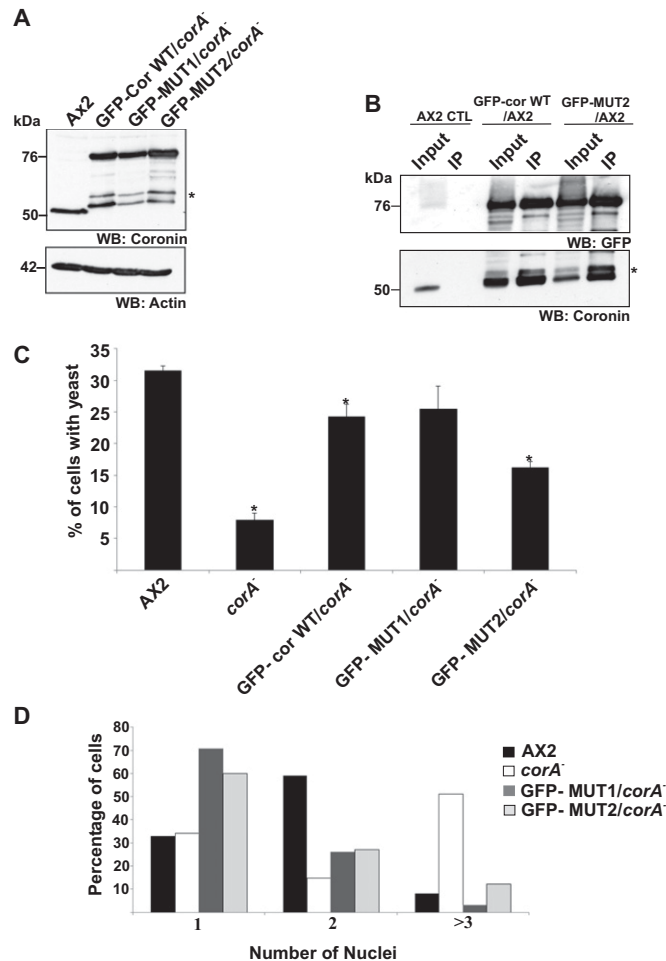

**Fig. 54.** Analysis of the coronin CRIB mutant proteins. (A) Expression level of coronin CRIB mutant. Total cell lysates prepared from equal numbers of cells ( $2 \times 10^5$ ) were separated on 12% SDS gel and Western blots performed with anticoronin antibodies. The membrane was stripped and reprobed with anti-actin antibody as a loading control. The asterisk in the blot denotes degradation products of GFP fusion proteins. (B) Coronin CRIB mutant protein self-associates. Equal amounts of cell lysates from AX2, AX2 expressing GFP-*cor* WT, and GFP-MUT2 were immunoprecipitated with anti-GFP antibodies. Lysate and precipitates were analyzed by Western blots for the presence of GFP-tagged proteins with anti-GFP antibody (WB: GFP). The membrane was stripped and probed with anticoronin antibody to detect self-association (WB: coronin). The star in the *Lower* panel indicates degradation products of the GFP fusion proteins. (C) AX2, *corA*<sup>-</sup>, GFP-*cor* WT, and GFP mutant-expressing cells (rescue) were allowed to sit on coverslips and challenged with TRITC labeled yeast for 15 min before methanol fixation. Two hundred or more cells for each strain were counted. The percentage of cells that had engulfed yeast is shown in the graph ( $*P < 0.05$ ). (D) Quantification of nuclei. Cells were fixed with methanol, and nuclei were stained with DAPI. Nuclei in more than 500 cells of each strain were quantified.
